---

Commentary

---

## Muscle biochemistry and the ontogeny of flight capacity during behavioral development in the honey bee, *Apis mellifera*

Stephen P. Roberts\* and Michelle M. Elekonich

Department of Biological Sciences, University of Nevada, Las Vegas, 4505 S. Maryland Parkway, Las Vegas, NV 89154-4004, USA

\*Author for correspondence (e-mail: sroberts@ccmail.nevada.edu)

Accepted 24 August 2005

### Summary

A fundamental issue in physiology and behavior is understanding the functional and genetic mechanisms that underlie major behavioral shifts in organisms as they adopt new environments or life history tactics. Such transitions are common in nature and include the age-related switch from nest/hive work to foraging in social insects such as honey bees (*Apis mellifera*). Because of their experimental tractability, recently sequenced genome and well understood biology, honey bees are an ideal model system for integrating molecular, genetic, physiological and sociobiological perspectives to advance understanding of behavioral and life history transitions. When honey bees (*Apis mellifera*) transition from hive work to foraging, their flight muscles undergo changes

that allow these insects to attain the highest rates of flight muscle metabolism and power output ever recorded in the animal kingdom. Here, we review research to date showing that honey bee flight muscles undergo significant changes in biochemistry and gene expression and that these changes accompany a significant increase in the capacity to generate metabolic and aerodynamic power during flight. It is likely that changes in muscle gene expression, biochemistry, metabolism and functional capacity may be driven primarily by behavior as opposed to age, as is the case for changes in honey bee brains.

Key words: behavioral development, flight, aerodynamics, energetics, gene expression, reserve capacity, *Apis mellifera*.

---

### Introduction

A central issue in physiology and ethology is understanding the metabolic and genetic mechanisms underlying major age-related shifts in behavior and life history. It is likely that the underlying mechanisms of such shifts are shared with or elaborated from mechanisms of neural and motor development, and behavioral plasticity in general, in an ecologically relevant manner across evolution. Furthermore, it is often the change in physiological capacity associated with these age-related shifts in behavior and life history that determines the adaptive value of the new behavior or life history tactic. Most research addressing this issue has focused on mechanisms and genes used by adult organisms during seasonal transitions in behavior (accompanying reproduction, migration, hibernation, estivation, etc.) or those used by sub-adult organisms during behavioral transitions accompanying environmental and/or resource shifts that occur during development. Much less studied are the underlying mechanisms of behavioral transitions that occur typically only once during the adult stage as an organism adopts a new environment or life history tactic. Such transitions are common in nature and often accompany increased physiological capacity for the behavior, such as the sex change that occurs with increased size or loss of a dominant

individual in some groups of fishes (e.g. Demski, 1987; Cardwell and Liley, 1991). Other examples of adult behavioral transitions supported by shifts in physiological function include endocrine and environmentally induced insect polymorphisms (e.g. Applebaum and Heifetz, 1999; Pener and Yerushalmi, 1997; Rankin, 1991; Zera and Cisper, 2001; Zhao and Zera, 2002, 2004), the transition from saltwater to freshwater during salmon spawning migrations (Dittman and Quinn, 1996; Mommsen, 2004; Onuma et al., 2003), acquisition of song and associated changes in gene expression and neural structure in many species of passerine birds (Brenowitz and Beecher, 2005; Clayton, 2004; Mello et al., 2004) or the increased power output in flight muscle that accompanies dragonfly adult maturation (Fitzhugh and Marden, 1997; Marden et al., 1999, 2001).

Another classic example is the transition from nest work to foraging in social insects, which is the focus of this commentary. Understanding the physiological and genetic underpinnings of behavioral transitions requires the study of model organisms whose ethology, physiology and genome are simultaneously well characterized and experimentally tractable. At present, few model organisms satisfy all these

demanding criteria because most have yielded genetic and physiological findings without an understanding of their behavior in an ecological–evolutionary context or *vice versa*. However, the honey bee, *Apis mellifera*, is a model system whose experimental tractability is powerful and rapidly evolving, making this species among the best available for the study of social behavior and development. Indeed, honey bee evolution, behavior, physiology and genetics are each well represented in an abundant literature (>5000 references) on this species.

Honey bees are oviparous (egg laying), holometabolous (completely metamorphosing) insects that live in large colonies usually containing over 20 000 individuals. Embryos and larvae are individually housed in open cells on honeycombs and are cared for by adult bees. The environment of the brood is maintained by the bees and is remarkably constant. The temperature is maintained between 30 and 35°C, carbon dioxide levels are held between 1 and 4.3%, and relative humidity is regulated between 70 and 75% (Winston, 1987). Honey bees exhibit a form of behavioral development termed ‘temporal polyethism’, moving through a series of behaviorally defined life history stages in an age-related fashion. For the first 2–3 weeks of life, adult workers perform tasks inside the hive such as brood care (‘nursing’) and hive maintenance. Typically at about 3 weeks of age, workers transition to performing tasks outside the hive such as foraging. Foraging bees are typically the oldest workers in the hive. The physiology of honey bees changes as they age and move from non-flying tasks in the hive to foraging, which imparts a suite of different functional demands. For example, hypopharyngeal glands regress and produce enzymes for processing nectar instead of brood food, juvenile hormone levels increase, body mass decreases, body water content increases and, as we describe in more detail below, metabolic and flight capacity increases (Fluri et al., 1982; Harrison, 1986; Huang et al., 1994; Ohashi et al., 1996, 1999; Pontoh and Low, 2002; Robinson and Vargo, 1997; Winston, 1987).

Many behavioral transitions made as animals enter a new environment or life history stage in adulthood typically occur only once, but honey bee adult behavioral development is exceedingly plastic and responsive to the social environment; honey bees can move into a later stage precociously, delay the transition or return to a previous behavior (and the previous physiological state associated with that behavior) depending on the social context and colony needs. For example, in colonies deficient in nurses, young bees will continue to tend brood rather than switch to outside tasks (Robinson et al., 1989). Similarly, in colonies completely lacking young bees, older bees that would normally be foragers often revert to nursing behavior. In reverted nurses, juvenile hormone levels drop and their hypopharyngeal glands enlarge to resemble those of normally aged nurses (Huang and Robinson, 1996; Page et al., 1992; Robinson et al., 1992). The effect of colony demography on foraging behavior appears to be due to social inhibition, as the presence of older foraging bees inhibits foraging by younger bees. In colonies that lack a normal cohort of older

foraging bees, younger bees begin to forage precociously – as early as 5 days of age (Huang and Robinson, 1992; Robinson et al., 1989). When normal-aged foragers are transplanted into a ‘single-cohort’ colony containing only young bees, precocious development of foraging does not occur (Huang and Robinson, 1992). In addition, adult behavioral development also varies with a colony’s genetic background and is sensitive to factors such as weather, season, parasite infestation and colony nutritional status (Giray and Robinson, 1994; Giray et al., 1999; Huang and Robinson, 1995; Janmaat and Winston, 2000; Kolmes and Winston, 1988; Page et al., 1992; Schulz et al., 1998).

### Honey bee behavioral genetics

Behavioral development in honey bees requires the same underlying processes such as learning, circadian rhythmicity, motor control, and sensory processing as it does in rats, mice or humans. Many of these processes have been studied at the molecular level in the brains of vertebrate models. These pathways are likely to be common to both vertebrates and invertebrates and, thus, many studies of honey bee behavioral development have focused on changes in gene expression in the brain. Among the genes in the brain known to be differentially regulated between foragers and nurses is the clock gene *period*, which is involved in regulating circadian rhythmicity, which honey bees acquire just prior to the onset of foraging behavior (Bloch et al., 2001; Toma et al., 2000). Foragers and nurses also differentially express genes involved in calcium and cholinergic signaling (Shapira et al., 2001; Takeuchi et al., 2002), as well as those coding for cAMP-dependent protein kinases, which control protein function and act in intracellular signaling during memory formation (Fiala et al., 1999).

Recently, cDNA microarrays developed from a honey bee expressed sequence tag (EST) database (Whitfield et al., 2002) have revealed different patterns of gene expression in forager vs nurse brains independent of age (Whitfield et al., 2003). Among the genes differentially regulated between behavioral groups are those with strong sequence matches to annotated *Drosophila* genes important in axiogenesis, cell adhesion and intracellular signaling. In the latter class is *foraging (for)*, a previously identified cGMP-dependent protein kinase whose pharmacological activation causes precocious positive phototaxis and precocious foraging (Ben-Shahar et al., 2002, 2003). Similarly, a recent macroarray study demonstrates higher expression levels for genes involved in signal transduction, ion channels, neurotransmitter transport, transcription factors, plasma membrane proteins and most cell adhesion proteins in foragers as compared with newly emerged bees, suggesting plasticity and remodeling of neurocellular properties during aging and/or behavioral development in honey bees (Tsuchimoto et al., 2004). Using an earlier non-normalized version of the honey bee brain cDNA library later used to develop the bee EST database, Kucharski and Maleszka (2002) showed that foragers also increase the

expression of genes encoding royal jelly proteins, metabolic enzymes ( $\alpha$ -glucosidase, aminopeptidases, glucose dehydrogenase) and a LIM domain protein that is a putative transcription regulator.

Gene expression in honey bee brains is also sensitive to environmental factors. Exposure to queen mandibular pheromone (which is known to promote brood care among hive bees) upregulates genes typically expressed by nurses working at brood care and downregulates genes whose expression levels are typically higher in foraging bees (Grozinger et al., 2003). These studies clearly show that gene expression in honey bee brains changes relative to behavioral task and help to identify some of the genetic and biochemical mechanisms underlying behavioral transitions in this species. An important remaining goal is to identify the suite of functional and genetic changes in other honey bee tissues, such as flight muscle, during the switch to foraging, a task that requires rates of metabolism and muscle power production that are among the highest ever recorded in the animal kingdom (see Roberts and Harrison, 1999).

#### Age-related changes in flight metabolism and muscle biochemistry in honey bees

Adult honey bees go from being unable to fly during the first day following eclosion to generating spectacular rates of metabolism and aerodynamic power (up to  $0.8 \text{ W g}^{-1}$  and  $0.2 \text{ W g}^{-1}$ , respectively; Roberts and Harrison, 1999) that enable later work outside the hive, traveling up to 8 km from the hive and carrying loads equivalent to their body mass during foraging and undertaking. The development of flight ability generally occurs in two distinct periods, the first being the 3–4 days following eclosion and the second typically at 14–21 days post-eclosion during the transition from hive work to foraging. 1-day-old bees that are physically agitated (a manipulation generally assumed to induce maximal metabolic capacity) can generate metabolic rates of only  $0.1 \text{ W g}^{-1}$  and are isothermic with the surrounding air. Hovering 2-day-old bees have metabolic rates approaching  $0.3 \text{ W g}^{-1}$  and are more endothermic; coincident with the increase in metabolic capacity of young bees are dramatic increases in thoracic pyruvate kinase and citrate synthase activities as well as thoracic glycogen levels (Fewell and Harrison, 2001; Harrison, 1986; Harrison and Fewell, 2002; Moritz, 1988; Neukirch, 1982). Such biochemical changes should, in theory, greatly increase flux capacity through the citric acid cycle and the rate of NADH and FADH<sub>2</sub> recycling. Flight metabolic rates, thoracic enzyme levels and thoracic glycogen levels remain relatively constant over the 1–3-week period when the bees work within the hive. Then, at the onset of foraging (14–21 days post-eclosion), there is an approximate 15% increase in agitated flight metabolic rate, coincident with an approximate doubling of thoracic glycogen levels (Fewell and Harrison, 2001; Harrison, 1986). Further enhancing oxidative capacity in honey bee flight muscle is a 10-fold increase in cytochrome concentrations from 1 to 20 days after eclosion

(Herold and Borei, 1963). Similarly, cytochrome *c* oxidase activity increases twofold during flight muscle maturation in adult grasshoppers (Sogl et al., 2000). Variation in insect flight metabolism and/or performance has been linked to allozyme variation in several enzymes involved in cellular respiration, including phosphoglucose isomerase (Watt, 1992), glycerol-3-phosphate dehydrogenase (Barnes and Laurie-Ahlberg, 1986) and malate dehydrogenase (Coelho and Mitton, 1988; Harrison et al., 1996b). In addition, quantitative trait locus (QTL) analysis in *Drosophila* has linked the metabolic enzymes glycogen synthase, hexokinase, phosphoglucomutase and trehalase activity to variation in metabolic rate and flight performance (Montooth et al., 2003). Hence, age and/or behavior-dependent variation in these and other metabolic enzymes may underlie the development of flight capability in adult honey bees.

Structural and regulatory proteins of the flight muscle may also be changing as honey bees age and transition to flight-dependent behaviors. Honey bees possess asynchronous flight muscle (AFM). Unlike synchronous muscles (which, like typical striated muscles, have a 1:1 ratio of neural stimuli to contractions, with contraction initiated by intracellular calcium release and terminated by calcium uptake by the sarcoplasmic reticulum), AFMs show an approximately 1:10 ratio of neural stimuli to contractions. Neural stimulation in AFM releases intracellular calcium that removes thin filament inhibition, but the cross bridges themselves are activated by stretch and deactivated by sarcomere shortening. AFMs are stretched by thoracic deformation caused by contraction of antagonistic muscles, and this mechanical feedback keeps AFMs contracting over many cycles (Josephson et al., 2000; Pringle, 1957; Tregear, 1977). The large, power-producing AFMs are controlled by a set of small synchronous muscles that produce little or no power but are capable of rapid and finely graded responses to neural stimuli (Dickinson and Tu, 1997; Dickinson et al., 1998). Troponin-T (TnT) is the tropomyosin-binding protein of the calcium-regulated troponin complex of striated muscle, and honey bees express different TnT isoforms in their thoraces at one-day vs five-day post-eclosion (Domingo et al., 1998). This result suggests that honey bees are altering their calcium-dependent regulation of muscle contraction in an age-specific manner consistent with the acquisition of functional flight capability. In flight muscles of the dragonfly *Libellula pulchella*, the mixture of TnT isoforms also changes during adult maturation, with correlated changes in calcium sensitivity of muscle activation, twitch contraction kinetics and other indices of aerodynamic power output during free flight (Fitzhugh and Marden, 1997; Marden et al., 1999, 2001). Studies of *Drosophila* mutants have elucidated the roles of numerous other genes involved in the structure and regulation of AFMs whose expression may vary in an age- or behavior-dependent manner in honey bees. These genes include those coding for myosin regulatory light chain (Moore et al., 2000; Tohtong et al., 1995), flightin (Ayer and Vigoreaux, 2003; Henkin et al., 2004; Reedy et al., 2000), paramyosin/miniparamyosin (Maroto et al., 1996), calcineurin (Gajewski

et al., 2003), kettin (Kulke et al., 2001) and tropomodulin (Mardahl-Dumesnil and Fowler, 2001).

Supporting the hypothesis that honey bee flight muscles undergo significant age and/or behavior-dependent biochemical changes is our recent observation that foragers express greater amounts of heat shock proteins (Hsps) in their thoraces relative to nurse bees (Fig. 1). Hsps are part of a larger suite of molecular chaperones that participate in the maturation, maintenance and degradation of diverse proteins in both unstressed and stressed cells and are nearly universal in organisms (Feder and Hofmann, 1999; Gething, 1997; Morimoto et al., 1994). We measured Hsp70 and other members of the 70-kDa family of molecular chaperones in honey bee heads and thoraces as a function of age/behavior (nurse bees vs older foragers returning from a trip). Foragers expressed more Hsp70 in their thoraces than nurse bees, although there was no significant difference in head Hsp70 expression between the two groups (Fig. 1). One explanation for this result may be that foragers have hotter thoraces, but not heads, than hive bees. While this is true in some circumstances (Stabentheiner, 2001), it is also possible that elevated Hsp70 expression in forager thoraces may be due to

the extreme protein degradation, repair, maturation and replacement needed by the heavily taxed forager flight muscles (conservatively estimated to contract over 4 million times per day based on 5 h of flight per day and 240 wingbeats per second; Winston, 1987; Harrison et al., 1996a).

The development of flight and metabolic capacity in honey bees is also subject to circulating juvenile hormone (JH) levels, which rise before the onset of foraging (Elekonich et al., 2001; Jassim et al., 2000) and typically are much higher in foragers compared with nurses (reviewed by Bloch et al., 2002). Honey bees that have had their corpora allata (the sole source of JH) surgically removed still become foragers, but at an older age than intact bees. Treatment with the JH analog methoprene after allatectomy eliminates this delay (Sullivan et al., 2000). Hence, JH does not activate foraging (Elekonich and Robinson, 2000) but rather influences the pace at which honey bees develop into foragers. Mortality during the first orientation flight of foragers is higher in allatectomized honey bees than in sham and untreated honey bees (Sullivan et al., 2000, 2003). Furthermore, allatectomized honey bees have significantly reduced ground speeds during orientation flights, decreased flight ability and lower flight metabolic rates relative to sham and untreated honey bees (Sullivan et al., 2003).

Endocrine influences on muscle development and capacity are well known in both insects and vertebrates. For humans and other mammals, the effects of testosterone and other steroids to increase muscle mass, increase power output, decrease protein degradation and increase amino acid utilization in mammals are well known (Herbst and Bhasin, 2004; Bhasin et al., 2001). Thyroid hormone, the most similar to JH in structure, acts on muscle function at the cellular level by modulating sodium, potassium and calcium ATPase levels (Everts, 1996). In a variety of other insects, JH, ecdysone and octopamine are all known to influence muscle development, flight ability and life history transitions (Applebaum and Heifetz, 1999; Dingle and Winchell, 1977; Pener and Yerushalmi, 1998; Rankin, 1991; Roy and VijayRaghavan, 1999). The wing polymorphic crickets (*Gryllus firmus*) are particularly well studied with regard to reproduction, lipid biosynthesis, flight capability and endocrine control. Adult JH titers induce ovarian development and, in contrast to the honey bee, increased JH in early adulthood induces flight muscle histolysis in the flight-capable morphs (Zera and Cisner, 2001; Zhao and Zera, 2002, 2004).

The examples discussed here represent but few of the numerous possible molecular and biochemical changes that underlie the maturation of honey bee flight muscle performance. With the recent completion of the honey bee genome sequence, research is underway to (1) identify

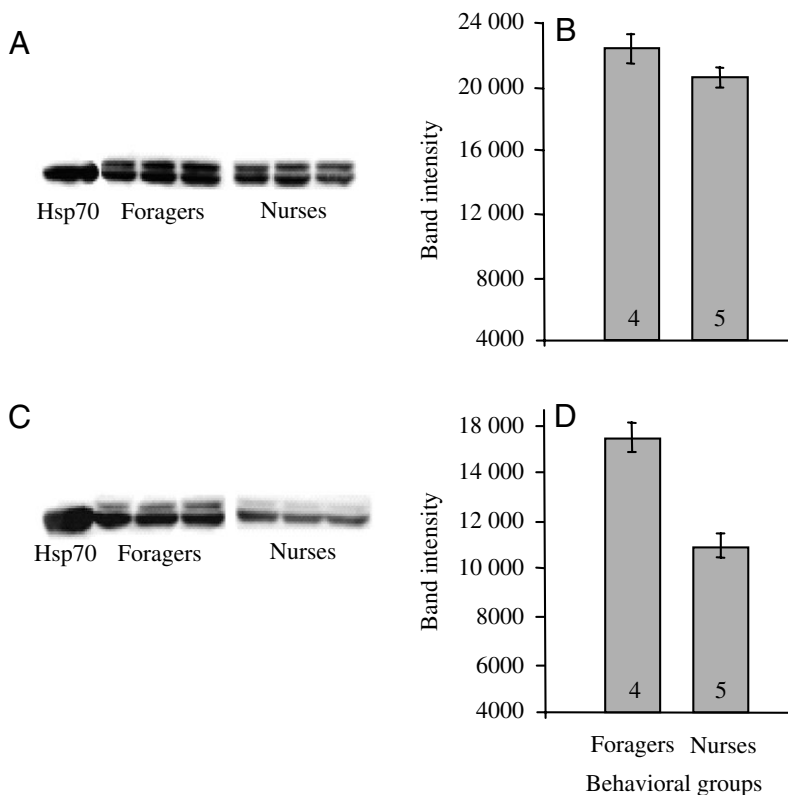

Fig. 1. Hsp70 expression in honey bee nurses and foragers. (A,B) Hsp70 expression in heads; (C,D) Hsp70 expression in thoraces. Hsp70 family proteins were isolated on western blots labeled with a Hsp70 mouse monoclonal antibody (Sigma, St Louis, MO, USA; H5147) and an anti-mouse secondary antibody conjugated to horseradish peroxidase (Sigma). Proteins were visualized with enhanced chemiluminescence and quantified on a Typhoon Phosphorimager (Amersham, UK). The Hsp70 standard is 0.5  $\mu$ g of purified Hsp70 protein (from bovine brain; Sigma; H9776). Numbers in bars indicate sample size.

additional molecular and biochemical variation associated with the transition to foraging, (2) determine whether such variation corresponds to the development of aerodynamic and metabolic performance and (3) determine whether such variation is driven primarily by age or behavior.

The authors thank Dr Gene Robinson and Karen Pruett of the University of Illinois Bee Research Facility and Kate Shen of the University of Nevada, Las Vegas (UNLV) Genomics Center for helpful discussions and technical support. This work is supported by a National Science Foundation Grant (IBN-0517635) to M.M.E. and S.P.R., a Nevada Applied Research Initiative Award to S.P.R. and a UNLV New Investigator Award to M.M.E.

### References

- Applebaum, S. W. and Heifetz, Y. (1999). Density-dependent physiological phase in insects. *Annu. Rev. Entomol.* **44**, 317-341.
- Ayer, G. and Vigoreaux, J. O. (2003). Flightin is a myosin rod binding protein. *Cell Biochem. Biophys.* **38**, 41-54.
- Barnes, P. T. and Laurie-Ahlberg, C. C. (1986). Genetic variability of flight metabolism in *Drosophila melanogaster*. III. Effects of Gpdh allozymes and environmental temperature on power output. *Genetics* **112**, 267-294.
- Ben-Shahar, Y., Robichon, A., Sokolowski, M. B. and Robinson, G. E. (2002). Influence of gene action across different time scales on behavior. *Science* **296**, 741-744.
- Ben-Shahar, Y., Leung, H. T., Pak, W. L., Sokolowski, M. B. and Robinson, G. E. (2003). cGMP-dependent changes in phototaxis: a possible role for the foraging gene in honey bee division of labor. *J. Exp. Biol.* **206**, 2507-2515.
- Bhasin, S., Woodhouse, L. and Storer, T. W. (2001). Proof of the effect of testosterone on skeletal muscle. *J. Endocrinol.* **170**, 27-38.
- Bloch, G., Toma, D. P. and Robinson, G. E. (2001). Behavioral rhythmicity, age, division of labor and period expression in the honey bee brain. *J. Biol. Rhythm* **16**, 444-456.
- Bloch, G., Wheeler, D. E. and Robinson, G. E. (2002). Endocrine influences on the organization of insect societies. In *Hormones and Brain Behaviour* (ed. D. W. Pfaff), pp. 195-235. San Diego: Academic Press.
- Brenowitz, E. A. and Beecher, M. D. (2005). Song learning in birds: diversity, plasticity, opportunities and challenges. *Trends Neurosci.* **28**, 127-132.
- Cardwell, J. R. and Liley, N. R. (1991). Hormonal control of sex and color change in the stoplight parrot fish, *Sparisoma viride* (Scaridae). *Gen. Comp. Endocrinol.* **81**, 7-20.
- Clayton, D. F. (2004). Songbird genomics: methods, mechanisms, opportunities, and pitfalls. *Ann. New York Acad. Sci.* **1016**, 45-60.
- Coelho, J. R. and Mitton, J. B. (1988). Oxygen consumption during hovering is associated with genetic variation of enzymes in honey-bees. *Funct. Ecol.* **2**, 141-146.
- Demski, L. S. (1987). Diversity in reproductive patterns and behavior in teleost fishes. In *Psychobiology of Reproductive Behavior* (ed. D. Crews), pp. 2-27. Englewood Cliffs, New Jersey: Prentice Hall.
- Dickinson, M. H. and Tu, M. S. (1997). The function of Dipteran flight muscle. *Comp. Biochem. Physiol.* **116A**, 223-238.
- Dickinson, M. H., Lehmann, F. O. and Chan, W. P. (1998). The control of mechanical power in insect flight. *Am. Zool.* **38**, 718-728.
- Dingle, H. and Winchell, R. (1997). Juvenile hormone as a mediator of plasticity in insect life histories. *Arch. Insect Biochem. Physiol.* **35**, 359-373.
- Dittman, A. H. and Quinn, T. P. (1996). Homing in Pacific salmon: Mechanisms and ecological basis. *J. Exp. Biol.* **199**, 83-91.
- Domingo, A., Gonzalez-Jurado, J., Maroto, M., Diaz, C., Vinos, J., Carrasco, C., Cervera, M. and Marco, R. (1998). Troponin-T is a calcium-binding protein in insect muscle: *in vivo* phosphorylation, muscle-specific isoforms and developmental profile in *Drosophila melanogaster*. *J. Muscle Res. Cell Motil.* **19**, 393-403.
- Elekovich, M. M. and Robinson, G. E. (2000). Organizational and activational effects of hormones on insect behavior. *J. Insect Physiol.* **46**, 1509-1515.
- Elekovich, M. M., Schulz, D. J., Bloch, G. and Robinson, G. E. (2001). Juvenile hormone levels in honey bee (*Apis mellifera* L.) foragers: foraging experience and diurnal variation. *J. Insect Physiol.* **47**, 1119-1125.
- Everts, M. E. (1996). Effects of thyroid hormones on contractility and cation transport in skeletal muscle. *Acta Physiol. Scand.* **156**, 325-333.
- Feder, M. E. and Hofmann, G. E. (1999). Heat-shock proteins, molecular chaperones, and the stress response: evolutionary and ecological physiology. *Annu. Rev. Physiol.* **61**, 243-282.
- Fewell, J. H. and Harrison, J. F. (2001). Variation in worker behavior of African and European honey bees. In *Proceedings of the Second International Congress on Africanized Bees and Bee Mites* (ed. R. E. Page and E. Erickson), pp. 3-15. New York: A. I. Root.
- Fiala, A., Müller, U. and Menzel, R. (1999). Reversible downregulation of protein kinase A during olfactory learning using antisense technique impairs long-term memory formation in the honeybee, *Apis mellifera*. *J. Neurosci.* **19**, 10125-10134.
- Fitzhugh, G. H. and Marden, J. H. (1997). Maturational changes in troponin-t expression, Ca<sup>2+</sup> sensitivity and twitch contraction kinetics in dragonfly flight muscle. *J. Exp. Biol.* **200**, 1473-1482.
- Fluri, P., Lüscher, M., Willie, H. and Gerig, L. (1982). Changes in weight of the pharyngeal gland and haemolymph titers of juvenile hormone, protein and vitellogenin in worker honey bees. *J. Insect Physiol.* **28**, 61-68.
- Gajewski, K., Wang, J. B., Molkentin, J. D., Chen, E. H., Olson, E. N. and Schulz, R. A. (2003). Requirement of the calcineurin subunit gene canB2 for indirect flight muscle formation in *Drosophila*. *Proc. Natl. Acad. Sci. USA* **100**, 1040-1045.
- Gething, M. J. (ed.) (1997). *Guidebook to Molecular Chaperones and Protein-Folding Catalysts*. Oxford: Oxford University Press.
- Giray, T. and Robinson, G. E. (1994). Effects of intracolony variability in behavioral development on plasticity of division of labor in honey bee colonies. *Behav. Ecol. Sociobiol.* **35**, 13-20.
- Giray, T., Huang, Z. Y., Guzmán-Novoa, E. and Robinson, G. E. (1999). Physiological correlates of genetic variation for rate of behavioral development in the honey bee, *Apis mellifera*. *Behav. Ecol. Sociobiol.* **47**, 17-28.
- Grozinger, C. M., Sharabash, N. M., Whitfield, C. W. and Robinson, G. E. (2003). Pheromone-mediated gene expression in the honey bee brain. *Proc. Natl. Acad. Sci. USA* **100**, 14519-14525.
- Harrison, J. (1986). Caste-specific changes in honey bee flight capacity. *Physiol. Zool.* **59**, 175-187.
- Harrison, J. F. and Fewell, J. H. (2002). Environmental and genetic influences on flight metabolic rate in the honey bee, *Apis mellifera*. *Comp. Biochem. Physiol.* **133A**, 323-333.
- Harrison, J. F., Fewell, J. H., Roberts, S. P. and Hall, H. G. (1996a). Achievement of thermal stability by varying metabolic heat production in flying honeybees. *Science* **274**, 88-90.
- Harrison, J. F., Nielsen, D. I. and Page, R. E. J. (1996b). Malate dehydrogenase phenotype, temperature and colony effects on flight metabolic rate in the honey-bee, *Apis mellifera*. *Funct. Ecol.* **10**, 81-88.
- Henkin, J. A., Maughan, D. W. and Vigoreaux, J. O. (2004). Mutations that affect flightin expression in *Drosophila* alter the viscoelastic properties of flight muscle fibers. *Am. J. Physiol. Cell Physiol.* **286**, C65-C72.
- Herbst, K. L. and Bhasin, S. (2004). Testosterone action on skeletal muscle. *Curr. Opin. Clin. Nutr. Metab. Care* **7**, 271-277.
- Herold, R. C. and Borei, H. (1963). Cytochrome changes during honey bee flight muscle development. *Dev. Biol.* **8**, 67-79.
- Huang, Z. Y. and Robinson, G. E. (1992). Honey bee colony integration: Worker-worker interactions mediate hormonally regulated plasticity in division of labor. *Proc. Natl. Acad. Sci. USA* **89**, 11726-11729.
- Huang, Z. Y. and Robinson, G. E. (1995). Seasonal changes in juvenile hormone titers and rates of biosynthesis in honey bees. *J. Comp. Physiol. B* **165**, 18-28.
- Huang, Z. Y. and Robinson, G. E. (1996). Regulation of honey bee division of labor by colony age demography. *Behav. Ecol. Sociobiol.* **39**, 147-158.
- Huang, Z. Y., Robinson, G. E. and Borst, D. W. (1994). Physiological correlates of division of labor among similarly aged honey bees. *J. Comp. Physiol. A* **174**, 731-739.
- Janmaat, A. and Winston, M. L. (2000). The influence of pollen storage area and *Varroa jacobsoni* Oudemans parasitism on temporal caste structure in honey bees (*Apis mellifera* L.). *Insect Soc.* **47**, 177-182.
- Jassim, O., Huang, Z. Y. and Robinson, G. E. (2000). Juvenile hormone profiles of worker honey bees, *Apis mellifera*, during normal and accelerated behavioural development. *J. Insect Physiol.* **46**, 243-249.

- Josephson, R. K., Malamud, J. G. and Stokes, D. R. (2000). Asynchronous Muscle: A Primer. *J. Exp. Biol.* **203**, 2713-2722.
- Kolmes, S. A. and Winston, M. L. (1988). Division of labour among worker honey bees in demographically manipulated colonies. *Insect Soc.* **35**, 262-270.
- Kucharski, R. and Maleszka, R. (2002). Evaluation of differential gene expression during behavioral development in the honeybee using microarrays and northern blots. *Genome Biol.* **3**, 7.1-7.9.
- Kulke, M., Neagoe, C., Kolmerer, B., Minajeva, A., Hinssen, H., Bullard, B. and Linke, W. A. (2001). Kettin, a major source of myofibrillar stiffness in *Drosophila* indirect flight muscle. *J. Cell Biol.* **154**, 1045-1057.
- Mardahl-Dumesnil, M. and Fowler, V. M. (2001). Thin filaments elongate from their pointed ends during myofibril assembly in *Drosophila* indirect flight muscle. *J. Cell Biol.* **155**, 1043-1053.
- Marden, J. H., Fitzhugh, G. H., Wolf, M. R., Arnold, K. D. and Rowan, B. (1999). Alternative splicing, muscle calcium sensitivity, and the modulation of dragonfly flight performance. *Proc. Natl. Acad. Sci. USA* **96**, 15304-15309.
- Marden, J. H., Fitzhugh, G. H., Girgenrath, M., Wolf, M. R. and Girgenrath, S. (2001). Alternative splicing, muscle contraction and intraspecific variation: associations between troponin T transcripts, Ca<sup>2+</sup> sensitivity and the force and power output of dragonfly flight muscles during oscillatory contraction. *J. Exp. Biol.* **204**, 3457-3470.
- Maroto, M., Arredondo, J., Goulding, D., Marco, R., Bullard, B. and Cervera, M. (1996). *Drosophila* paramyosin miniparamyosin gene products show a large diversity in quantity, localization, and isoform pattern: A possible role in muscle maturation and function. *J. Cell Biol.* **134**, 81-92.
- Mello, C. V., Velho, T. A. and Pinaud, R. (2004). Song-induced gene expression: a window on song auditory processing and perception. *Ann. New York Acad. Sci.* **1016**, 263-281.
- Mommsen, T. P. (2004). Salmon spawning migration and muscle protein metabolism: the August Krogh principle at work. *Comp. Biochem. Physiol.* **139B**, 383-400.
- Montooth, K. L., Marden, J. H. and Clark, A. G. (2003). Mapping determinants of variation in energy metabolism, respiration and flight in *Drosophila*. *Genetics* **165**, 623-635.
- Moore, J. R., Dickinson, M. H., Vigoreaux, J. O. and Maughan, D. W. (2000). The effect of removing the N-terminal extension of the *Drosophila* myosin regulatory light chain upon flight ability and the contractile dynamics of the indirect flight muscle. *Biophys. J.* **78**, 1431-1440.
- Morimoto, R. I., Tissieres, A. and Georgopoulos, C. (ed.) (1994). *Heat Shock Proteins: Structure, Function and Regulation*. New York: Cold Spring Harbor Press.
- Moritz, R. F. A. (1988). Biochemical changes during honeybee flight muscle development. In *The Flying Honeybee; Aspects of Energetics* (ed. W. Nachtigall), pp. 51-65. Stuttgart, New York: Gustav Fischer.
- Neukirch, A. (1982). Dependence of the life-span of the honeybee (*Apis mellifera*) upon flight performance and energy consumption. *J. Comp. Physiol. B* **146**, 35-40.
- Ohashi, K., Sawata, M., Takeuchi, H., Natori, S. and Kubo, T. (1996). Molecular cloning of cDNA and analysis of expression of the gene for alpha-glucosidase from the hypopharyngeal gland of the honeybee *Apis mellifera* L. *Biochem. Biophys. Res. Commun.* **221**, 380-385.
- Ohashi, K., Natori, S. and Kubo, T. (1999). Expression of amylase and glucose oxidase in the hypopharyngeal gland with an age-dependent role change of the worker honeybee (*Apis mellifera* L.). *Eur. J. Biochem.* **265**, 127-133.
- Onuma, T., Kitahashi, T., Taniyama, S., Saito, D., Ando, H. and Urano, A. (2003). Changes in expression of genes encoding gonadotropin subunits and growth hormone/prolactin/somatolactin family hormones during final maturation and freshwater adaptation in prespawning chum salmon. *Endocrine* **20**, 23-34.
- Page, R. E., Robinson, G. E., Britton, D. S. and Fondrk, M. K. (1992). Genotypic variability for rates of behavioral development in worker honey bees (*Apis mellifera* L.). *Behav. Ecol.* **3**, 173-180.
- Pener, M. P. and Yerushalmi, Y. (1998). The physiology of locust phase polymorphism: an update. *J. Insect Physiol.* **44**, 365-377.
- Pontoh, J. and Low, N. H. (2002). Purification and characterization of beta-glucosidase from honey bees (*Apis mellifera*). *Insect Biochem. Molec. Biol.* **32**, 679-690.
- Pringle, J. W. S. (1957). *Insect Flight*. Cambridge: Cambridge University Press.
- Rankin, M. A. (1991). Endocrine effects on migration. *Am. Zool.* **31**, 217-230.
- Reedy, M. C., Bullard, B. and Vigoreaux, J. O. (2000). Flightin is essential for thick filament assembly and sarcomere stability in *Drosophila* flight muscles. *J. Cell Biol.* **151**, 1483-1499.
- Roberts, S. P. and Harrison, J. F. (1999). Mechanisms of thermal stability during flight in the honeybee *Apis mellifera*. *J. Exp. Biol.* **202**, 1523-1533.
- Robinson, G. E. and Vargo, E. L. (1997). Juvenile hormone in adult eusocial Hymenoptera: Gonadotropin and behavioral pacemaker. *Arch. Insect Biochem. Physiol.* **35**, 559-583.
- Robinson, G. E., Page, R. E., Strambi, C. and Strambi, A. (1989). Hormonal and genetic control of behavioral integration in honey bee colonies. *Science* **246**, 109-112.
- Robinson, G. E., Page, R. E., Strambi, C. and Strambi, A. (1992). Colony integration in honey bees: mechanisms of behavioural reversion. *Ethology* **90**, 336-350.
- Roy, S. and VijayRaghavan, K. (1999). Muscle pattern diversification in *Drosophila*: the story of imaginal myogenesis. *BioEssays* **21**, 486-498.
- Schulz, D. J., Huang, Z. Y. and Robinson, G. E. (1998). Effects of colony food shortage on behavioral development in honey bees. *Behav. Ecol. Sociobiol.* **42**, 295-303.
- Shapira, M., Thompson, C. K., Soreq, H. and Robinson, G. E. (2001). Changes in neuronal acetylcholinesterase gene expression and division of labor in honey bee colonies. *J. Mol. Neurosci.* **17**, 1-12.
- Sogl, B., Gellissen, G. and Wiesner, R. J. (2000). Biogenesis of giant mitochondria during insect flight muscle development in the locust, *Locusta migratoria* (L.) - Transcription, translation and copy number of mitochondrial DNA. *Eur. J. Biochem.* **267**, 11-17.
- Stabentheiner, A. (2001). Thermoregulation of dancing bees: thoracic temperature of pollen and nectar foragers in relation to profitability of foraging and colony need. *J. Insect Physiol.* **47**, 385-392.
- Sullivan, J. P., Jassim, O., Fahrbach, S. E. and Robinson, G. E. (2000). Juvenile hormone paces behavioral development in the adult worker honey bee. *Horm. Behav.* **37**, 1-14.
- Sullivan, J. P., Fahrbach, S. E., Harrison, J. F., Capaldi, E. A., Fewell, J. H. and Robinson, G. E. (2003). Juvenile hormone and division of labor in honey bee colonies: effects of allatectomy on flight behavior and metabolism. *J. Exp. Biol.* **206**, 2287-2296.
- Takeuchi, H., Fujiyuki, T., Shirai, K., Matsuo, Y., Kamikouchi, A., Fujinawa, Y., Kato, A., Tsujimoto, A. and Kubo, T. (2002). Identification of genes expressed preferentially in the honeybee mushroom bodies by combination of differential display and cDNA microarray. *FEBS Lett.* **25807**, 230-234.
- Tohtong, R., Yamashita, H., Graham, M., Haerberle, J., Simcox, A. and Maughan, D. (1995). Impairment of muscle function caused by mutations of phosphorylation sites in myosin regulatory light-chain. *Nature* **374**, 650-653.
- Toma, D. P., Bloch, G., Moore, D. and Robinson, G. E. (2000). Changes in period mRNA levels in the brain and division of labor in honey bee colonies. *Proc. Natl. Acad. Sci. USA* **97**, 6914-6919.
- Tregear, R. T. (1977). *Insect Flight Muscle*. Amsterdam: North-Holland.
- Tsujimoto, M., Aoki, M., Takada, M., Kanou, Y., Sasagawa, H., Kitagawa, Y. and Kadowaki, T. (2004). The changes of gene expression in honey bee (*Apis mellifera*) brains associated with ages. *Zool. Sci.* **21**, 23-28.
- Watt, W. B. (1992). Eggs, enzymes, and evolution: natural genetic variants change insect fecundity. *Proc. Natl. Acad. Sci. USA* **89**, 10608-10612.
- Whitfield, C. W., Band, M. R., Bonaldo, M. F., Kumar, C. G., Liu, L., Pardini, J. R., Robertson, H. M., Soares, M. B. and Robinson, G. E. (2002). Annotated expressed sequence tags and cDNA microarrays for studies of brain and behavior in the honey bee. *Genome Res.* **12**, 555-566.
- Whitfield, C. W., Cziko, A. M. and Robinson, G. E. (2003). Gene expression profiles in the brain predict behavior in individual honey bees. *Science* **302**, 296-299.
- Winston, M. L. (1987). *The Biology of the Honey Bee*, pp. 89-109. Cambridge, Massachusetts: Harvard University Press.
- Zera, A. J. and Cisper, G. (2001). Genetic and diurnal variation in the juvenile hormone titer in a wing-polymorphic cricket: Implications for the evolution of life histories and dispersal. *Physiol. Biochem. Zool.* **74**, 293-306.
- Zhao, Z. and Zera, A. J. (2002). Differential lipid biosynthesis underlies a tradeoff between reproduction and flight capability in a wing-polymorphic cricket. *Proc. Natl. Acad. Sci. USA* **99**, 16829-16834.
- Zhao, Z. and Zera, A. J. (2004). The hemolymph JH titer exhibits a large-amplitude, morph-dependent, diurnal cycle in the wing-polymorphic cricket, *Gyrllus firmus*. *J. Insect Physiol.* **50**, 93-102.
